# Supplementary material for: Nanoparticulate STING agonists are potent lymph node–targeted vaccine adjuvants
Source: JCI journal article supplement (doi:10.1172/jci79915), 2015-05-03
Supplement: sd1 [file 1]

**Supplementary Information for:**

**Nanoparticulate STING agonists are potent lymph node-targeted vaccine adjuvants**

Melissa C. Hanson<sup>1,2</sup>, Monica Crespo<sup>2</sup>, Wuhbet Abraham<sup>2</sup>, Kelly Moynihan<sup>1,2,3</sup>, Greg Lee Szeto<sup>1,2,3,4</sup>,  
Stephanie Chen<sup>4</sup>, Mariane B. Melo<sup>2</sup>, Stefanie Mueller<sup>2</sup>, and Darrell J. Irvine<sup>1,2,3,4,5,\*</sup>

<sup>1</sup> Department of Biological Engineering, Massachusetts Institute of Technology, Cambridge, MA 02139, USA

<sup>2</sup> David H. Koch Institute for Integrative Cancer Research, Massachusetts Institute of Technology, Cambridge, MA 02139, USA

<sup>3</sup> The Ragon Institute of MGH, MIT, and Harvard, 400 Technology Square, Cambridge, MA 02139, USA

<sup>4</sup> Department of Materials Science & Engineering, Massachusetts Institute of Technology, Cambridge, MA 02139, USA

<sup>5</sup> Howard Hughes Medical Institute, Chevy Chase, MD 20815, USA

Address correspondence to: Darrell J. Irvine, 500 Main St, 76-261, Cambridge, Massachusetts 02139, USA. Phone: (617) 452-4174; Email: [djirvine@mit.edu](mailto:djirvine@mit.edu).

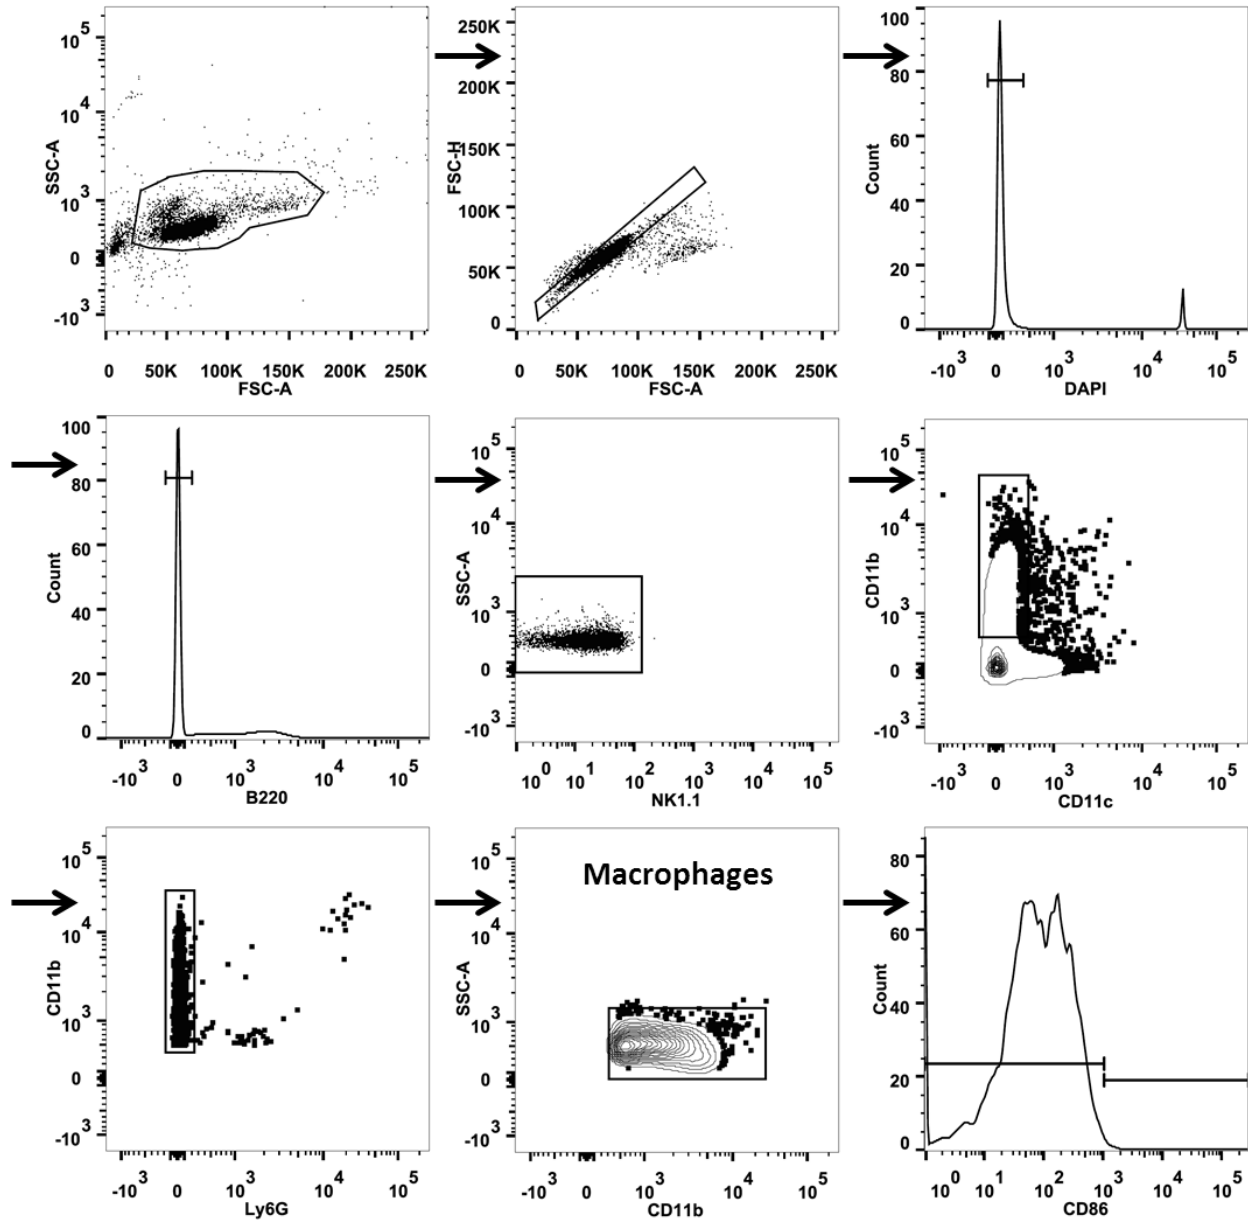

**Supplemental Figure 1: Gating to identify lymph node macrophages.** Representative staining of naïve balb/c mice for lymph node macrophages, which were defined as B220<sup>-</sup>NK1.1<sup>-</sup>CD11c<sup>-</sup>CD11b<sup>+</sup>Ly6G<sup>-</sup>SSC<sup>lo</sup> of single live cells. For activation studies, CD86<sup>+</sup> macrophages were defined by histogram gating.

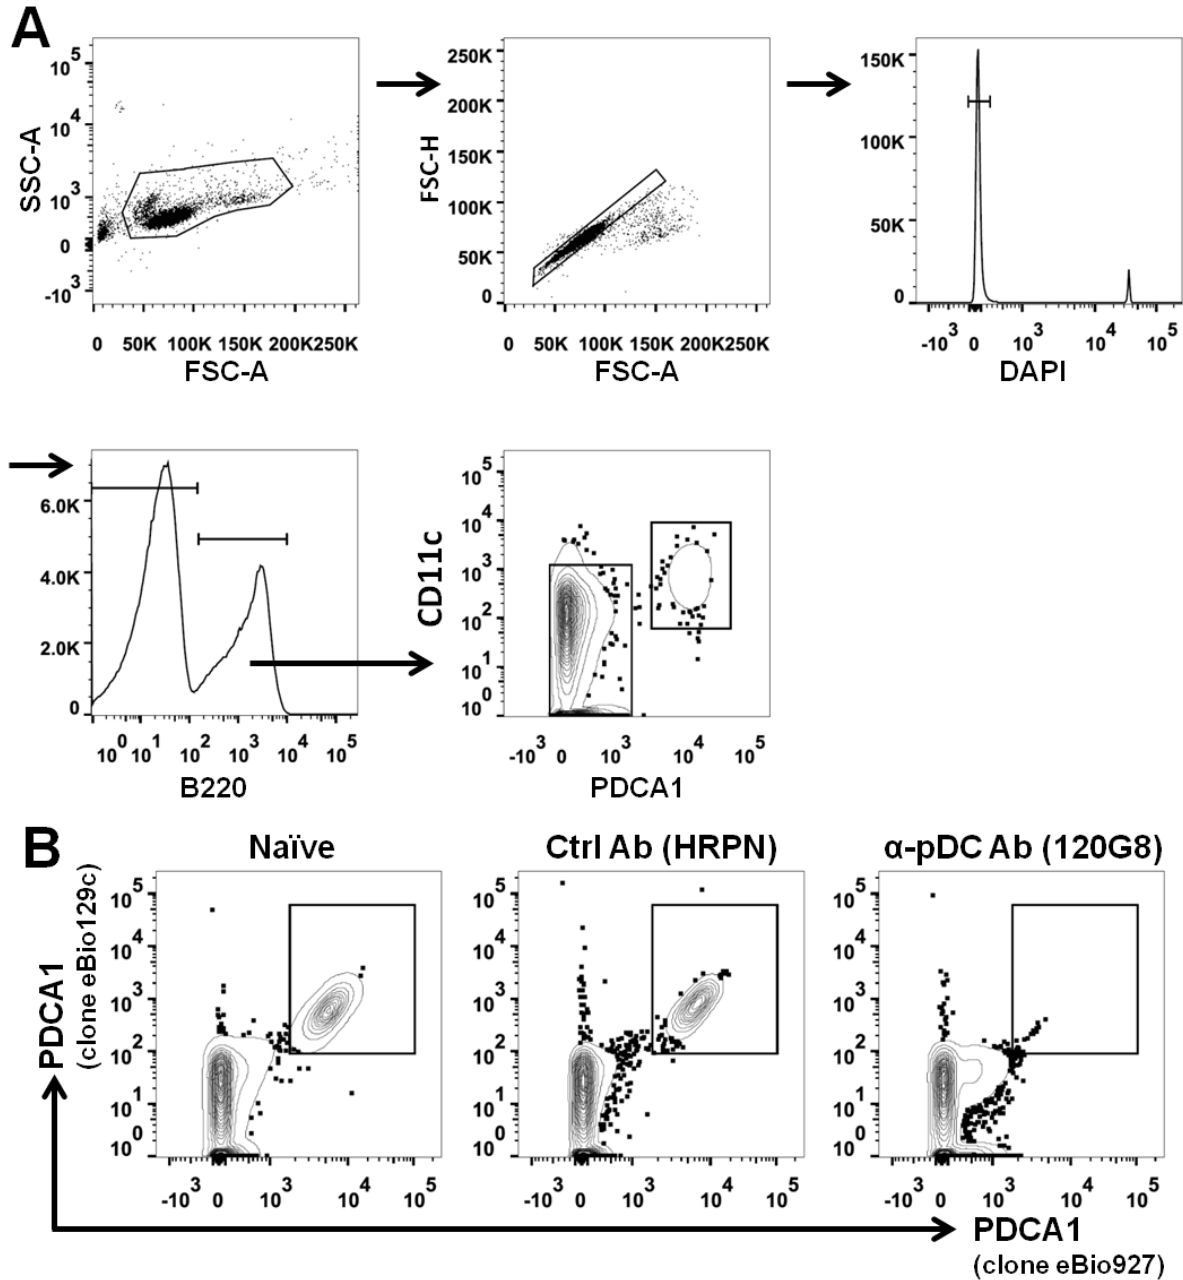

**Supplemental Figure 2: Flow cytometry gating and depletion of plasmacytoid dendritic cells.** (A) Representative gating of naïve balb/c mice for identification of plasmacytoid dendritic cells, which were defined as PDCA1<sup>+</sup> CD11c<sup>+</sup> of B220<sup>+</sup> of live cells of single cells of total cells. (B) Representative dual PDCA1 staining of pDCs to confirm depletion of pDCs in mice treated with 500 μg 120G8 i.p. at 24 hours prior to necropsy and staining. pDCs were defined as PDCA1(clone eBio927)<sup>+</sup> PDCA1(clone eBio129c)<sup>+</sup> of CD11c<sup>+</sup> B220<sup>+</sup> live cells.

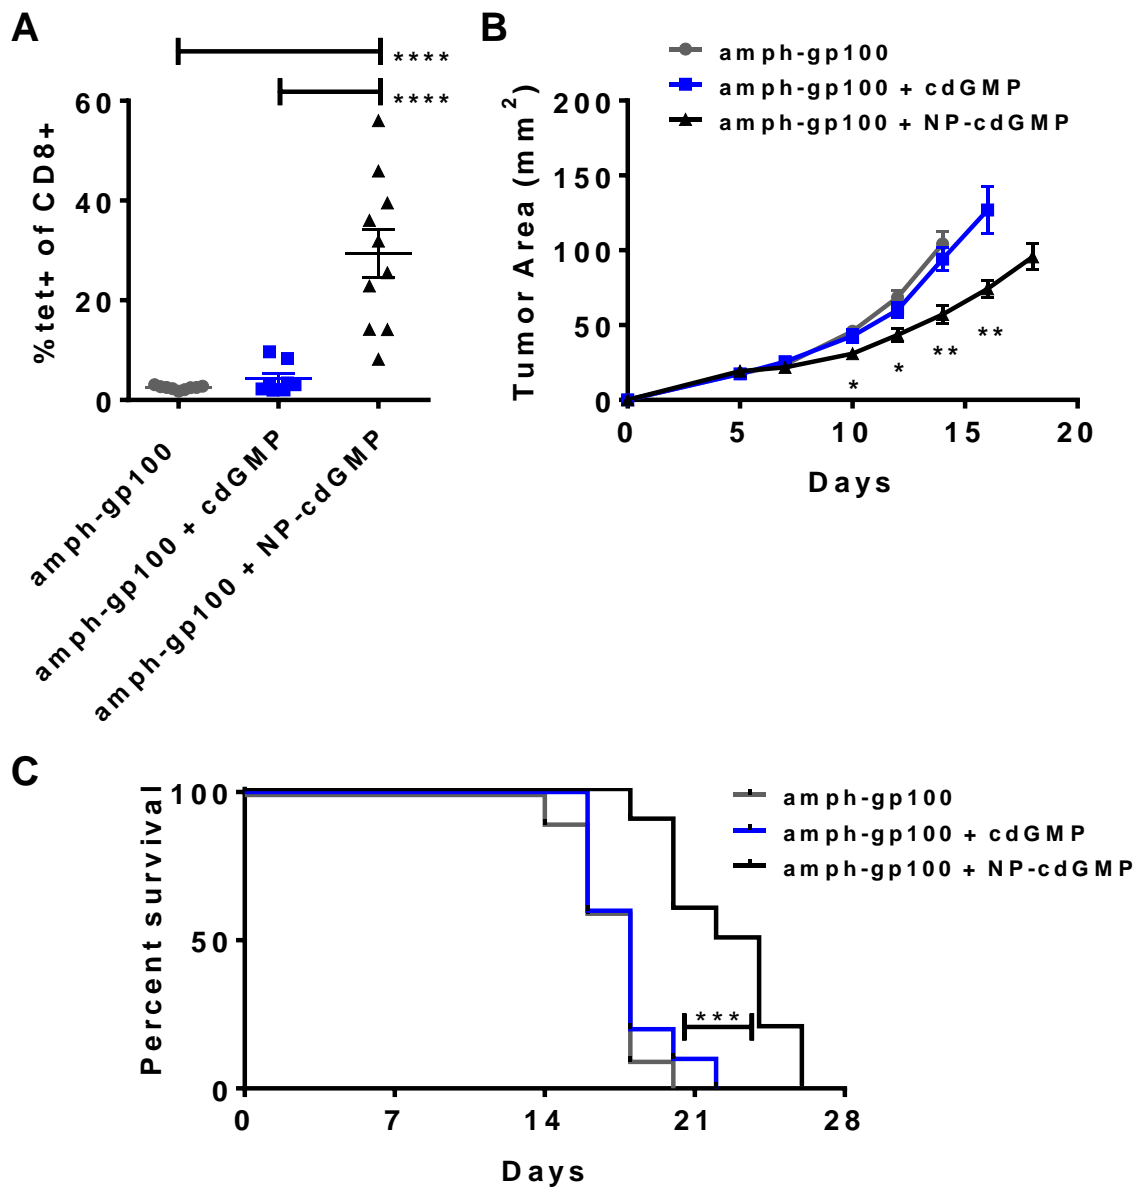

**Supplemental Figure 3: NP-cdGMP delays B16.F10 tumor growth.** C57BL/6 mice ( $n=10/\text{group}$ ) were inoculated with  $2.5 \times 10^5$  B16.F10 cells s.c. on day 0 and vaccinated on days 5, 12, and 19 with  $10 \mu\text{g}$  amph-gp100 alone or adjuvanted with  $5 \mu\text{g}$  cdGMP or  $5 \mu\text{g}$  NP-cdGMP. **(A)** Percent SIINFEKL-tetramer positive  $\text{CD8}^+$  T-cells among PBMCs on day 18. **(B)** Mean tumor size over time (compared to OVA alone). **(C)** Survival curves over time. \*,  $p < 0.05$ ; \*\*,  $p < 0.01$ ; \*\*\*,  $p < 0.001$ , \*\*\*\*,  $p < 0.0001$ .
